# Supplementary material for: Evaluating the Ocular Safety Profile of Glucagon-Like Peptide-1 Receptor Agonists
Source: Research Square preprint supplement (doi:10.21203/rs.3.rs-8371495/v1), 2025-12-29

Evaluating the Ocular Safety Profile of Glucagon-Like Peptide-1 Receptor Agonists

**Supplementary Material**

### Table of Contents

| Diagnoses Covariates sTable 1 | Page 1 |
| --- | --- |
| Medications Covariates sTable 2 | Page 4 |
| Demographics Covariates sTable 3 | Page 5 |
| Procedures Covariates sTable 4 | Page 6 |
| Labs & Value Range Covariates sTable 5 | Page 10 |
| Additional Procedure Codes sTable 6 (DR Exclusion Criteria) | Page 12 |
| Proportional Hazard Values sTable 7 | Page 13 |
| Secondary Analyses Covariates sTable 8 | Page 14 |
| Kaplan-Meier Curves sFigures 1-9 | Page 21 - 29 |
| nAMD Kernel-Density Plots sFigure 10 | Page 30 |

Authors:
Zaid Khan1, MS, Fatima Chaudhry1, MS, Neal Dhar2, BA, Rohit Adyanthaya1,3, MD

Affiliations:
1. Macon and Joan Brock Virginia Health Sciences, Eastern Virginia Medical School at Old Dominion University, Norfolk, VA
2. Carter Immunology Center, University of Virginia School of Medicine, Charlottesville, VA
3. Virginia Eye Consultants, Norfolk, VA

sTable 1. Diagnoses used as Covariates (Primary Analyses)
DR = Diabetic Retinopathy, nAMD = neovascular age-related macular degeneration
Std Diff. = Standard Mean Difference

| **Diagnoses** | **nAMD Patient #**  Top Value, Cohort A  Bottom Value, Cohort B | **nAMD Std diff.** | **Glaucoma Patient #**  Top Value, Cohort C  Bottom Value, Cohort D | **Glaucoma Std diff.** | **DR Patient #**  Top Value, Cohort E  Bottom Value, Cohort F | **DR  Std diff.** |
| --- | --- | --- | --- | --- | --- | --- |
| ICD-10-CM I10  Essential (primary) hypertension | 770  784 | 0.0381 | 151,357  151,251 | 0.0011 | 8,006  8,006 | - |
| ICD-10-CM E78  Disorders of lipoprotein metabolism and other lipidemias | 759  764 | 0.0132 | 139,011  138,875 | 0.0014 | 6,424  6,423 | 0.0003 |
| ICD-10-CM E66  Overweight and obesity | 463  455 | 0.0168 | 72,910  71,982 | 0.0093 | 6,205  6,199 | 0.0018 |
| ICD-10-CM I25  Chronic ischemic heart disease | 335  360 | 0.0546 | 49,035  49,040 | < 0.0001 | 3,610  3,611 | 0.0003 |
| ICD-10-CM G47.33  Obstructive sleep apnea (adult) (pediatric) | 297  303 | 0.0136 | 36,661  36,553 | 0.0014 | 2,433  2,433 | < 0.0001 |
| ICD-10-CM N18  Chronic kidney disease (CKD) | 285  285 | < 0.0001 | 30,291  29,394 | 0.0122 | 2,387  2,354 | 0.009 |
| ICD-10-CM I50  Heart failure | 214  222 | 0.02 | 26,938  26,850 | 0.0013 | 1,660  1,652 | 0.0025 |
| ICD-10-CM I48  Atrial fibrillation and flutter | 192  196 | 0.0104 | 25,547  25,330 | 0.0032 | 1,542  1,531 | 0.0035 |
| ICD-10-CM I12  Hypertensive chronic kidney disease | 188  184 | 0.0106 | 24,175  24,161 | 0.0002 | 1,503  1,492 | 0.0035 |
| ICD-10-CM N17  Acute kidney failure | 163  183 | 0.0545 | 20,547  20,463 | 0.0013 | 1,411  1,378 | 0.0109 |
| ICD-10-CM I11  Hypertensive heart disease | 138  147 | 0.0265 | 18,660  18,705 | 0.0008 | 1,142  1,153 | 0.0039 |
| ICD-10-CM F17  Nicotine dependence | 107  110 | 0.0099 | 13,666  13,636 | 0.0006 | 901  905 | 0.0016 |
| ICD-10-CM I63  Cerebral infarction | 75  75 | < 0.0001 | 11,962  11,845 | 0.0024 | 860  848 | 0.0049 |
| ICD-10-CM I13  Hypertensive heart and chronic kidney disease | 73  72 | 0.004 | 11,068  11,047 | 0.0004 | 734  725 | 0.0039 |
| ICD-10-CM I21  Acute myocardial infarction | 72  74 | 0.0079 | 8,128  7,988 | 0.0035 | 723  711 | 0.0052 |
| ICD-10-CM Z79.5  Long term (current) use of steroids | 68  78 | 0.0395 | 7,471  7,355 | 0.003 | 597  587 | 0.0048 |
| ICD-10-CM I15  Secondary hypertension | 59  61 | 0.0087 | 7,089  6,921 | 0.0045 | 479  478 | 0.0005 |
| ICD-10-CM G45  Transient cerebral ischemic attacks and related syndromes | 54  52 | 0.0092 | 5,469  5,410 | 0.0018 | 436  448 | 0.0066 |
| ICD-10-CM M06  Other rheumatoid arthritis | 37  36 | 0.0055 | 5,057  4,929 | 0.004 | 433  428 | 0.0028 |
| ICD-10-CM Z72.0  Tobacco use | 31  29 | 0.012 | 4,232  4,255 | 0.0008 | 397  396 | 0.0006 |
| ICD-10-CM L40  Psoriasis | 27  30 | 0.0185 | 3,966  3,967 | < 0.0001 | 303  303 | < 0.0001 |
| ICD-10-CM I24  Other acute ischemic heart diseases | 26  30 | 0.0249 | 3,614  3,537 | 0.0028 | 223  213 | 0.0077 |
| ICD-10-CM I16  Hypertensive crisis | 25  22 | 0.0203 | 2,820  2,772 | 0.002 | 221  214 | 0.0054 |
| ICD-10-CM M35.0  Sjögren syndrome | 22  20 | 0.0143 | 1,776  1,771 | 0.0003 | 204  192 | 0.0097 |
| ICD-10-CM N19  Unspecified kidney failure | 16  14 | 0.0169 | 1,316  1,289 | 0.0016 | 131  121 | 0.01 |
| ICD-10-CM H44.2  Degenerative myopia | 13  12 | 0.0092 | 1,053  1,043 | 0.0007 | 83  78 | 0.0063 |
| ICD-10-CM M32  Systemic lupus erythematosus (SLE) | 13  13 | < 0.0001 | 990  1,005 | 0.001 | 74  72 | 0.0026 |
| ICD-10-CM K51  Ulcerative colitis | 10  10 | < 0.0001 | 884  871 | 0.001 | 65  78 | 0.0173 |
| ICD-10-CM I22  Subsequent ST elevation (STEMI) and non-ST elevation (NSTEMI) myocardial infarction | 10  10 | < 0.0001 | 796  821 | 0.0019 | 53  50 | 0.0047 |
| ICD-10-CM I23  Certain current complications following ST elevation (STEMI) and non-ST elevation (NSTEMI) myocardial infarction (within the 28 day period) | 10  10 | < 0.0001 | 362  349 | 0.0015 | 43  45 | 0.0034 |
| ICD-10-CM Z92.24  Personal history of steroid therapy | 10  10 | < 0.0001 | 176  170 | 0.001 | 35  38 | 0.0056 |
| ICD-10-CM M05  Rheumatoid arthritis with rheumatoid factor | 10  10 | < 0.0001 | 175  174 | 0.0002 | 35  32 | 0.0058 |
| ICD-10-CM K50  Crohn's disease [regional enteritis] | 10  10 | < 0.0001 | 152  150 | 0.0004 | 20  20 | < 0.0001 |
| ICD-10-CM M45  Ankylosing spondylitis | 10  10 | < 0.0001 | 146  145 | 0.0002 | 19  18 | 0.0026 |
| ICD-10-CM I1A  Other hypertension | 10  10 | < 0.0001 | 115  134 | 0.0037 | 12  15 | 0.0091 |

sTable 2. Medications used as Covariates (Primary Analyses)
DR = Diabetic Retinopathy, nAMD = neovascular age-related macular degeneration
Std Diff. = Standard Mean Difference

| **Medications** | **nAMD Patient #**  Top Value, Cohort A  Bottom Value, Cohort B | **nAMD Std diff.** | **Glaucoma Patient #**  Top Value, Cohort C  Bottom Value, Cohort D | **Glaucoma Std diff.** | **DR Patient #**  Top Value, Cohort E  Bottom Value, Cohort F | **DR  Std diff.** |
| --- | --- | --- | --- | --- | --- | --- |
| RxNorm 6809  Metformin | 628  633 | 0.0111 | 136,678  136,396 | 0.0028 | 5,768  5,748 | 0.0056 |
| RxNorm 83367  Atorvastatin | 539  526 | 0.0275 | 103,923  103,506 | 0.004 | 5,686  5,716 | 0.0083 |
| VAHS 501  Insulin | 490  494 | 0.0084 | 92,476  92,429 | 0.0005 | 4,803  4,807 | 0.001 |
| VACV 800  Ace inhibitors | 449  467 | 0.0379 | 84,571  84,513 | 0.0006 | 4,396  4,410 | 0.0035 |
| VACV 805  Angiotensin ii inhibitor | 380  374 | 0.0129 | 63,360  63,341 | 0.0002 | 2,958  2,984 | 0.0067 |
| RxNorm 36567  Simvastatin | 202  204 | 0.0051 | 30,803  30,698 | 0.0014 | 1,594  1,595 | 0.0003 |
| RxNorm 301542  Rosuvastatin | 201  193 | 0.0208 | 28,214  27,819 | 0.0055 | 1,456  1,470 | 0.0045 |
| RxNorm 6472  Lovastatin | 37  37 | < 0.0001 | 4,314  4,300 | 0.0005 | 287  297 | 0.0067 |
| RxNorm 861634  Pitavastatin | 10  11 | 0.0101 | 1,064  1,018 | 0.0031 | 25  25 | < 0.0001 |
| RxNorm 41127  Fluvastatin | 10  10 | < 0.0001 | 246  268 | 0.003 | 12  14 | 0.0062 |

sTable 3. Demographics used as Covariates (Primary Analyses)
DR = Diabetic Retinopathy, nAMD = neovascular age-related macular degeneration
Std Diff. = Standard Mean Difference

| **Demographics** | **nAMD Patients**  Top Value, Cohort A  Bottom Value, Cohort B | **nAMD Std diff.** | **Glaucoma Patients**  Top Value, Cohort C  Bottom Value, Cohort D | **Glaucoma Std diff.** | **DR Patients**  Top Value, Cohort E  Bottom Value, Cohort F | **DR  Std diff.** |
| --- | --- | --- | --- | --- | --- | --- |
| AI Age at Index | 951  951 | 0.0066 | 210,027  210,027 | 0.0038 | 8,006  8,006 | 0.002 |
| 2186-5  Not Hispanic or Latino | 700  701 | 0.0024 | 137,300  137,155 | 0.0015 | 5,089  5,068 | 0.0054 |
| 2106-3 White | 650  641 | 0.0203 | 129,280  129,702 | 0.0041 | 4,358  4,354 | 0.001 |
| F  Female | 511  495 | 0.0337 | 103,664  103,251 | 0.0039 | 3,960  3,949 | 0.0027 |
| M  Male | 390  400 | 0.0213 | 101,565  101,969 | 0.0038 | 3,844  3,845 | 0.0003 |
| UN  Unknown Ethnicity | 232  248 | 0.0387 | 53,232  53,339 | 0.0012 | 1,867  1,886 | 0.0056 |
| UNK  Unknown Race | 126  135 | 0.0275 | 36,093  36,264 | 0.0022 | 1,807  1,808 | 0.0003 |
| 2054-5  Black or African American | 69  62 | 0.0291 | 22,097  22,013 | 0.0013 | 1,110  1,130 | 0.0072 |
| 2135-2  Hispanic or Latino | 64  58 | 0.0258 | 19,495  19,533 | 0.0006 | 813  833 | 0.0082 |
| UN  Unknown Gender | 50  56 | 0.0275 | 10,725  10,748 | 0.0005 | 468  456 | 0.0064 |
| 2131-1  Other Race | 39  36 | 0.0162 | 9,022  8,438 | 0.0139 | 378  357 | 0.0125 |
| 2028-9  Asian | 21  20 | 0.0072 | 4,798  4,807 | 0.0003 | 202  212 | 0.0079 |
| 1002-5  American Indian or Alaska Native | 10  0 | 0.1458 | 1,410  1,429 | 0.0011 | 79  77 | 0.0025 |
| 2076-8  Native Hawaiian or Other Pacific Islander | 0  10 | 0.1458 | 1,400  1,433 | 0.0019 | 43  43 | < 0.0001 |

sTable 4. Procedures used as Covariates sTable 4 (Primary Analyses)
DR = Diabetic Retinopathy, nAMD = neovascular age-related macular degeneration
Std Diff. = Standard Mean Difference

| **Procedures** | **nAMD Patient #**  Top Value, Cohort A  Bottom Value, Cohort B | **nAMD Std diff.** | **Glaucoma Patient #**  Top Value Cohort, C  Bottom Value, Cohort D | **Glaucoma Std diff.** | **DR Patient #**  Top Value Cohort, E  Bottom Value Cohort, F | **DR  Std diff.** |
| --- | --- | --- | --- | --- | --- | --- |
| CPT 99214  Office or other outpatient visit for the evaluation and management of an established patient, which requires a medically appropriate history and/or examination and moderate level of medical decision making. When using total time on the date of the encounter for code selection, 30 minutes must be met or exceeded. | 540  544 | 0.0085 | 81,151  81,184 | 0.0003 | 4,434  4,433 | 0.0003 |
| CPT 99213  Office or other outpatient visit for the evaluation and management of an established patient, which requires a medically appropriate history and/or examination and low level of medical decision making. When using total time on the date of the encounter for code selection, 20 minutes must be met or exceeded. | 523  521 | 0.0042 | 72,336  71,986 | 0.0035 | 4,221  4,215 | 0.0015 |
| CPT 92014  Ophthalmological services: medical examination and evaluation, with initiation or continuation of diagnostic and treatment program; comprehensive, established patient, 1 or more visits | 424  411 | 0.0275 | 42,536  42,254 | 0.0033 | 2,667  2,656 | 0.0029 |
| CPT 99285  Emergency department visit for the evaluation and management of a patient, which requires a medically appropriate history and/or examination and high level of medical decision making | 270  257 | 0.0305 | 39,620  39,344 | 0.0034 | 2,356  2,367 | 0.003 |
| CPT 99284  Emergency department visit for the evaluation and management of a patient, which requires a medically appropriate history and/or examination and moderate level of medical decision making | 257  257 | < 0.0001 | 27,426  27,184 | 0.0034 | 2,332  2,323 | 0.0025 |
| CPT 92004  Ophthalmological services: medical examination and evaluation with initiation of diagnostic and treatment program; comprehensive, new patient, 1 or more visits | 253  266 | 0.0307 | 25,923  25,813 | 0.0016 | 2,007  2,011 | 0.0012 |
| CPT 99223  Initial hospital inpatient or observation care, per day, for the evaluation and management of a patient, which requires a medically appropriate history and/or examination and high level of medical decision making. When using total time on the date of the encounter for code selection, 75 minutes must be met or exceeded. | 182  194 | 0.0317 | 19,040  18,798 | 0.004 | 1,804  1,803 | 0.0003 |
| CPT 99283  Emergency department visit for the evaluation and management of a patient, which requires a medically appropriate history and/or examination and low level of medical decision making | 173  166 | 0.0192 | 9,700  9,568 | 0.003 | 1,522  1,493 | 0.0093 |
| CPT 99222  Initial hospital inpatient or observation care, per day, for the evaluation and management of a patient, which requires a medically appropriate history and/or examination and moderate level of medical decision making. When using total time on the date of the encounter for code selection, 55 minutes must be met or exceeded. | 143  147 | 0.0117 | 9,102  9,049 | 0.0012 | 1,249  1,245 | 0.0014 |
| CPT 99221  Initial hospital inpatient or observation care, per day, for the evaluation and management of a patient, which requires a medically appropriate history and/or examination and straightforward or low level medical decision making. When using total time on the date of the encounter for code selection, 40 minutes must be met or exceeded. | 72  73 | 0.004 | 8,900  8,887 | 0.0003 | 639  649 | 0.0046 |
| CPT 99282  Emergency department visit for the evaluation and management of a patient, which requires a medically appropriate history and/or examination and straightforward medical decision making | 61  57 | 0.0174 | 8,549  8,490 | 0.0014 | 570  592 | 0.0106 |
| CPT 99281  Emergency department visit for the evaluation and management of a patient that may not require the presence of a physician or other qualified health care professional | 17  16 | 0.0081 | 2,847  2,826 | 0.0009 | 220  216 | 0.0031 |

sTable 5. Labs & Lab Value Ranges used as Covariates (Primary Analyses)
DR = Diabetic Retinopathy, nAMD = neovascular age-related macular degeneration
Std Diff. = Standard Mean Difference

| **Labs** | **nAMD Patient #**  Top Value, Cohort A  Bottom Value, Cohort B | **nAMD Std diff.** | **Glaucoma Patient #**  Top Value, Cohort C  Bottom Value, Cohort D | **Glaucoma Std diff.** | **DR Patient #**  Top Value, Cohort E  Bottom Value, Cohort F | **DR  Std diff.** |
| --- | --- | --- | --- | --- | --- | --- |
| TNX Curated 8001  Glomerular filtration rate/1.73 sq M.predicted [Volume Rate/Area] in Serum, Plasma or Blood by Creatinine-based formula (MDRD) | 740  745 | 0.0298 | 150,609  153,239 | 0.0055 | 6,238  6,194 | 0.0314 |
| At least 60 mL/min/{1.73_m2} | 145  155 | 0.0289 | 24,887  24,755 | 0.0019 | 1,250  1,242 | 0.0028 |
| 30-59 mL/min/{1.73_m2} | 472  480 | 0.0168 | 63,410  63,287 | 0.0013 | 3,463  3,456 | 0.0018 |
| At most 30 mL/min/{1.73_m2} | 643  641 | 0.0045 | 130,731  130,788 | 0.0006 | 5,544  5,514 | 0.0081 |
| TNX Curated9037  Hemoglobin A1c/Hemoglobin.total in Blood | 663  669 | 0.0015 | 124,309  122,177 | 0.0584 | 5,723  5,687 | 0.0034 |
| 0-7 % | 531  541 | 0.0212 | 72,551  72,747 | 0.002 | 3,258  3,222 | 0.0092 |
| 7-9 % | 457  467 | 0.021 | 75,150  74,783 | 0.0036 | 4,444  4,450 | 0.0015 |
| 9-11 % | 203  217 | 0.0355 | 39,893  39,566 | 0.004 | 3,290  3,306 | 0.0041 |
| At least 11 % | 114  116 | 0.0065 | 25,053  24,731 | 0.0047 | 2,178  2,198 | 0.0056 |
| TNX Curated 9001  Cholesterol in HDL [Mass/volume] in Serum or Plasma | 620  634 | 0.0023 | 104,478  104,133 | 0.0204 | 5,303  5,352 | 0.0151 |
| At most 40 mg/dL | 400  418 | 0.0382 | 57,620  57,454 | 0.0018 | 3,153  3,153 | < 0.0001 |
| 40-60 mg/dL | 459  460 | 0.0021 | 66,909  66,902 | < 0.0001 | 3,854  3,871 | 0.0042 |
| At least 60 mg/dL | 327  341 | 0.0308 | 20,574  20,685 | 0.0018 | 1,399  1,408 | 0.003 |
| TNX Curated 9000  Cholesterol [Mass/volume] in Serum or Plasma | 237  242 | 0.0121 | 104,359  104,169 | 0.0137 | 5,288  5,312 | 0.0102 |
| At most 200 mg/dL | 619  635 | 0.0135 | 71,210  71,252 | 0.0004 | 3,097  3,124 | 0.0069 |
| 200-240 mg/dL | 358  368 | 0.0216 | 43,991  43,957 | 0.0004 | 3,528  3,559 | 0.0078 |
| At least 240 mg/dL | 486  475 | 0.0231 | 45,529  45,427 | 0.0012 | 2,799  2,780 | 0.005 |
| TNX Curated 9002  Cholesterol in LDL [Mass/volume] in Serum or Plasma | 210  206 | 0.0102 | 7,442  7,418 | 0.0006 | 2,018  2,017 | 0.0003 |
| 0-70 mg/dL | 617  632 | 0.0114 | 102,872  102,792 | 0.015 | 5,256  5,316 | 0.0194 |
| 70-100 mg/dL | 581  601 | 0.0434 | 45,284  45,120 | 0.0019 | 4,194  4,204 | 0.0025 |
| 100-130 mg/dL | 268  278 | 0.0232 | 56,695  56,708 | 0.0001 | 2,725  2,769 | 0.0116 |
| At least 130 mg/dL | 128  131 | 0.0092 | 46,043  46,014 | 0.0003 | 2,546  2,544 | 0.0005 |
| TNX Curated 9004  Triglyceride [Mass/volume] in Serum, Plasma or Blood | 615  631 | 0.0385 | 34,108  34,134 | 0.0003 | 437  446 | 0.0049 |
| At most 150 mg/dL | 513  521 | 0.0169 | 102,098  103,371 | 0.019 | 5,206  5,251 | 0.0007 |
| 150-200 mg/dL | 365  361 | 0.0087 | 88,661  88,623 | 0.0004 | 4,790  4,802 | 0.0031 |
| 200-500 mg/dL | 314  315 | 0.0022 | 36,658  36,578 | 0.001 | 2,188  2,181 | 0.002 |
| At least 500 mg/dL | 40  52 | 0.0588 | 19,143  19,122 | 0.0003 | 1,189  1,183 | 0.0021 |

sTable 6. Additional Ocular Procedure Codes
Used to enhance Diabetic Retinopathy exclusion criteria
CPT = Current Procedural Terminology, SNOMED = Systematized Nomenclature of Medicine
HCPCS = Healthcare Common Procedure Coding System

| CPT: 67036 | - Vitrectomy, mechanical, pars plana approach |
| --- | --- |
| CPT: 67039 | - Vitrectomy, mechanical, pars plana approach; with focal endolaser photocoagulation |
| CPT: 67040 | - Vitrectomy, mechanical, pars plana approach; with endolaser panretinal photocoagulation |
| CPT: 67041 | - Vitrectomy, mechanical, pars plana approach; with removal of preretinal cellular membrane (eg, macular pucker) |
| CPT: 67042 | - Vitrectomy, mechanical, pars plana approach; with removal of internal limiting membrane of retina (eg, for repair of macular hole, diabetic macular edema), includes, if performed, intraocular tamponade (ie, air, gas or silicone oil) |
| CPT: 67043 | - Vitrectomy, mechanical, pars plana approach; with removal of subretinal membrane (eg, choroidal neovascularization), includes, if performed, intraocular tamponade (ie, air, gas or silicone oil) and laser photocoagulation |
| CPT: 67228 | - Treatment of extensive or progressive retinopathy (eg, diabetic retinopathy), photocoagulation |
| CPT: 1014238 | - Vitrectomy, mechanical, pars plana approach |
| SNOMED: 172555009 | - Anterior Vitrectomy |
| SNOMED: 72019009 | - Mechanical vitrectomy by posterior approach |
| SNOMED: 75732000 | - Vitrectomy |
| SNOMED: 87021001 | - Mechanical vitrectomy by pars plana approach |
| HCPCS: C9770 | - Vitrectomy, mechanical, pars plana approach, with subretinal injection of pharmacologic/biologic agent (deprecated 2024) |

sTable 7. Proportional Hazards Assumption Values

nAMD = neovascular age-related macular degeneration
DR = Diabetic Retinopathy

| Pathology | Outcome Measurement | Proportionality Hazard  (*P =* n) |
| --- | --- | --- |
| nAMD | Diagnosis | 0.1098 |
| nAMD | Procedure | 0.2007 |
| Glaucoma (Primary) | Diagnosis | 0.3850 |
| Glaucoma (Primary) | Procedure | 0.6645 |
| DR | Diagnosis | 0.4771 |
| DR | Procedure | 0.9728 |
| Glaucoma (1-year) Secondary Analysis | Diagnosis | 0.6049 |
| Glaucoma (1-year) Secondary Analysis | Procedure | 0.8875 |
| Glaucoma (2-year) Secondary Analysis | Diagnosis | 0.4725 |
| Glaucoma (2-year) Secondary Analysis | Procedure | 0.2879 |

sTable 8. Glaucoma Secondary Analysis Covariates
Std Diff. = Standard Mean Difference

| Diagnoses | Glaucoma (1- Year) Patients Top Value, Cohort C Bottom Value, Cohort D | Std diff. | Glaucoma (2- Year) Patients Top Value, Cohort C Bottom Value, Cohort D | Std diff. |
| --- | --- | --- | --- | --- |
| ICD-10-CMI10 Essential (primary) hypertension | 148,497 148,344 | 0.0017 | 151,357 151,251 | 0.0011 |
| ICD-10-CME78 Disorders of lipoprotein metabolism and other lipidemias | 136,464 136,320 | 0.0015 | 139,011 138,875 | 0.0014 |
| ICD-10-CME66 Overweight and obesity | 71,816 70,954 | 0.0088 | 72,910 71,982 | 0.0093 |
| ICD-10-CMI25 Chronic ischemic heart disease | 48,206 48,370 | 0.0019 | 49,035 49,040 | < 0.0001 |
| ICD-10-CMN18 Chronic kidney disease (CKD) | 36,018 35,980 | 0.0005 | 36,661 36,553 | 0.0014 |
| ICD-10-CMG47.33 Obstructive sleep apnea (adult) (pediatric) | 29,908 28,957 | 0.0132 | 30,291 29,394 | 0.0122 |
| ICD-10-CMF17 Nicotine dependence | 26,594 26,575 | 0.0003 | 26,938 26,850 | 0.0013 |
| ICD-10-CMI50 Heart failure | 25,057 24,883 | 0.0026 | 25,547 25,330 | 0.0032 |
| ICD-10-CMN17 Acute kidney failure | 23,825 23,629 | 0.003 | 24,175 24,161 | 0.0002 |
| ICD-10-CMI48 Atrial fibrillation and flutter | 20,294 20,172 | 0.002 | 20,547 20,463 | 0.0013 |
| ICD-10-CMI12 Hypertensive chronic kidney disease | 18,438 18,378 | 0.001 | 18,660 18,705 | 0.0008 |
| ICD-10-CMI11 Hypertensive heart disease | 13,423 13,408 | 0.0003 | 13,666 13,636 | 0.0006 |
| ICD-10-CMI21 Acute myocardial infarction | 11,646 11,663 | 0.0004 | 11,962 11,845 | 0.0024 |
| ICD-10-CMI63 Cerebral infarction | 10,863 10,739 | 0.0027 | 11,068 11,047 | 0.0004 |
| ICD-10-CMZ72.0 Tobacco use | 8,026 7,890 | 0.0034 | 8,128 7,988 | 0.0035 |
| ICD-10-CMI13 Hypertensive heart and chronic kidney disease | 7,317 7,284 | 0.0009 | 7,471 7,355 | 0.003 |
| ICD-10-CMZ79.5 Long term (current) use of steroids | 6,849 6,763 | 0.0023 | 7,089 6,921 | 0.0045 |
| ICD-10-CMG45 Transient cerebral ischemic attacks and related syndromes | 5,324 5,288 | 0.0011 | 5,469 5,410 | 0.0018 |
| ICD-10-CMI15 Secondary hypertension | 5,002 4,897 | 0.0033 | 5,057 4,929 | 0.004 |
| ICD-10-CMM06 Other rheumatoid arthritis | 4,098 4,113 | 0.0005 | 4,232 4,255 | 0.0008 |
| ICD-10-CMI16 Hypertensive crisis | 3,884 3,870 | 0.0005 | 3,966 3,967 | < 0.0001 |
| ICD-10-CML40 Psoriasis | 3,527 3,475 | 0.002 | 3,614 3,537 | 0.0028 |
| ICD-10-CMI24 Other acute ischemic heart diseases | 2,776 2,725 | 0.0022 | 2,820 2,772 | 0.002 |
| ICD-10-CMN19 Unspecified kidney failure | 1,717 1,695 | 0.0012 | 1,776 1,771 | 0.0003 |
| ICD-10-CMK51 Ulcerative colitis | 1,270 1,264 | 0.0004 | 1,316 1,289 | 0.0016 |
| ICD-10-CMM32 Systemic lupus erythematosus (SLE) | 1,050 1,022 | 0.0019 | 1,053 1,043 | 0.0007 |
| ICD-10-CMK50 Crohn's disease [regional enteritis] | 963 980 | 0.0012 | 990 1,005 | 0.001 |
| ICD-10-CMM05 Rheumatoid arthritis with rheumatoid factor | 892 856 | 0.0027 | 884 871 | 0.001 |
| ICD-10-CMM35.0 Sjögren syndrome | 819 800 | 0.0015 | 796 821 | 0.0019 |
| ICD-10-CMM45 Ankylosing spondylitis | 343 340 | 0.0004 | 362 349 | 0.0015 |
| ICD-10-CMZ92.24 Personal history of steroid therapy | 164 160 | 0.0007 | 176 170 | 0.001 |
| ICD-10-CMI1A Other hypertension | 161 141 | 0.0036 | 175 174 | 0.0002 |
| ICD-10-CMI23 Certain current complications following ST elevation (STEMI) and non-ST elevation (NSTEMI) myocardial infarction (within the 28 day period) | 159 163 | 0.0007 | 152 150 | 0.0004 |
| ICD-10-CMH44.2 Degenerative myopia | 140 138 | 0.0004 | 146 145 | 0.0002 |
| ICD-10-CMI22 Subsequent ST elevation (STEMI) and non-ST elevation (NSTEMI) myocardial infarction | 123 132 | 0.0018 | 115 134 | 0.0037 |
| Medications | Glaucoma (1- Year) Patients Top Value, Cohort C Bottom Value, Cohort D | Std diff. | Glaucoma (2- Year) Patients Top Value, Cohort C Bottom Value, Cohort D | Std diff. |
| RxNorm6809 Metformin | 133,594 133,312 | 0.0029 | 136,678 136,396 | 0.0028 |
| VAHS501 Insulin | 102,147 101,606 | 0.0053 | 103,923 103,506 | 0.004 |
| RxNorm83367 Atorvastatin | 90,711 90,653 | 0.0006 | 92,476 92,429 | 0.0005 |
| VACV800 Ace inhibitors | 82,892 82,795 | 0.001 | 84,571 84,513 | 0.0006 |
| VACV805 Angiotensin ii inhibitor | 61,819 61,901 | 0.0009 | 63,360 63,341 | 0.0002 |
| RxNorm301542 Rosuvastatin | 29,985 30,000 | 0.0002 | 30,803 30,698 | 0.0014 |
| RxNorm36567 Simvastatin | 27,520 27,356 | 0.0023 | 28,214 27,819 | 0.0055 |
| RxNorm6472 Lovastatin | 4,231 4,216 | 0.0005 | 4,314 4,300 | 0.0005 |
| RxNorm861634 Pitavastatin | 1,040 988 | 0.0036 | 1,064 1,018 | 0.0031 |
| RxNorm41127 Fluvastatin | 265 265 | < 0.0001 | 246 268 | 0.003 |
| Labs | Glaucoma (1- Year) Patients Top Value, Cohort C Bottom Value, Cohort D | Std diff. | Glaucoma (2- Year) Patients Top Value, Cohort C Bottom Value, Cohort D | Std diff. |
| TNX Curated8001 Glomerular filtration rate/1.73 sq M.predicted [Volume Rate/Area] in Serum, Plasma or Blood by Creatinine-based formula (MDRD) | 149,561 151,996 | 0.0032 | 150,609 153,239 | 0.0055 |
| 0-30 mL/min/{1.73_m2} | 24,520 24,325 | 0.0029 | 24,887 24,755 | 0.0019 |
| 30-60 mL/min/{1.73_m2} | 62,899 62,964 | 0.0007 | 63,410 63,287 | 0.0013 |
| At least 60 mL/min/{1.73_m2} | 129,685 129,767 | 0.0008 | 130,731 130,788 | 0.0006 |
| TNX Curated9037 Hemoglobin A1c/Hemoglobin.total in Blood | 124,020 121,899 | 0.0601 | 124,309 122,177 | 0.0584 |
| 0-7 % | 72,220 72,505 | 0.0029 | 72,551 72,747 | 0.002 |
| 7-9 % | 75,026 74,712 | 0.0032 | 75,150 74,783 | 0.0036 |
| 9-11 % | 39,901 39,565 | 0.0041 | 39,893 39,566 | 0.004 |
| At least 11 % | 25,020 24,711 | 0.0046 | 25,053| 24,731 | 0.0047 |
| TNX Curated9001 Cholesterol in HDL [Mass/volume] in Serum or Plasma | 103,785 103,572 | 0.0215 | 104,478 104,133 | 0.0204 |
| At most 40 mg/dL | 57,370 57,253 | 0.0013 | 57,620 57,454 | 0.0018 |
| 40-60 mg/dL | 66,334 66,467 | 0.0014 | 66,909 66,902 | < 0.0001 |
| At least 60 mg/dL | 20,426 20,484 | 0.0009 | 20,574 20,685 | 0.0018 |
| TNX Curated9004 Triglyceride [Mass/volume] in Serum, Plasma or Blood | 103,673 103,639 | 0.0115 | 104,359 104,169 | 0.0137 |
| At most 150 mg/dL | 70,593 70,884 | 0.003 | 71,210 71,252 | 0.0004 |
| 150-200 mg/dL | 43,822 43,729 | 0.0011 | 43,991 43,957 | 0.0004 |
| 200-500 mg/dL | 45,464 45,241 | 0.0026 | 45,529 45,427 | 0.0012 |
| At least 500 mg/dL | 7,444 7,363 | 0.0021 | 7,442 7,418 | 0.0006 |
| TNX Curated9002 Cholesterol in LDL [Mass/volume] in Serum or Plasma | 102,209 102,213 | 0.0164 | 102,872 |102,792 | 0.015 |
| 0-70 mg/dL | 44,959 44,931 | 0.0003 | 45,284 45,120 | 0.0019 |
| 70-100 mg/dL | 56,381 56,297 | 0.0009 | 56,695 56,708 | 0.0001 |
| 100-130 mg/dL | 45,786 45,853 | 0.0008 | 46,043 46,014 | 0.0003 |
| At least 130 mg/dL | 33,968 33,955 | 0.0002 | 34,108 34,134 | 0.0003 |
| TNX Curated9000 Cholesterol [Mass/volume] in Serum or Plasma | 101,414 102,860 | 0.0191 | 102,098 103,371 | 0.019 |
| At most 200 mg/dL | 88,054 88,138 | 0.0008 | 88,661 88,623 | 0.0004 |
| 200-240 mg/dL | 36,479 36,400 | 0.001 | 36,658 36,578 | 0.001 |
| At least 240 mg/dL | 19,107 19,050 | 0.001 | 19,143 19,122 | 0.0003 |
| Demographics | Glaucoma (1- Year) Patients Top Value, Cohort C Bottom Value, Cohort D | Std diff. | Glaucoma (2- Year) Patients Top Value, Cohort C Bottom Value, Cohort D | Std diff. |
| AI Age at Index | 205,779 205,779 | 0.0043 | 210,027 210,027 | 0.0038 |
| 2186-5 Not Hispanic or Latino | 134,749 134,585 | 0.0017 | 137,300 137,155 | 0.0015 |
| 2106-3 White | 126,977 127,286 | 0.0031 | 129,280 129,702 | 0.0041 |
| F Female | 101,380 100,901 | 0.0047 | 103,664 103,251 | 0.0039 |
| M Male | 99,621 100,097 | 0.0046 | 101,565 101,969 | 0.0038 |
| UN Unknown Ethnicity | 52,634 52,703 | 0.0008 | 53,232 53,339 | 0.0012 |
| 2054-5 Black or African American | 35,255 35,440 | 0.0024 | 36,093 36,264 | 0.0022 |
| UNK Unknown Race | 21,375 21,245 | 0.0021 | 22,097 22,013 | 0.0013 |
| 2135-2 Hispanic or Latino | 18,396 18,491 | 0.0016 | 19,495 19,533 | 0.0006 |
| 2131-1 Other Race | 10,525 10,658 | 0.0029 | 10,725 10,748 | 0.0005 |
| 2028-9 Asian | 8,838 8,328 | 0.0124 | 9,022 8,438 | 0.0139 |
| UN Unknown Gender | 4,778 4,781 | < 0.0001 | 4,798 4,807 | 0.0003 |
| 2076-8 Native Hawaiian or Other Pacific Islander | 1,425 1,416 | 0.0005 | 1,410 1,429 | 0.0011 |
| 1002-5 American Indian or Alaska Native | 1,384 1,406 | 0.0013 | 1,400 1,433 | 0.0019 |
| Procedures | Glaucoma (1- Year) Patients Top Value, Cohort C Bottom Value, Cohort D | Std diff. | Glaucoma (2- Year) Patients  Top Value, Cohort C Bottom Value, Cohort D | Std diff. |
| CPT99214 Office or other outpatient visit for the evaluation and management of an established patient, which requires a medically appropriate history and/or examination and moderate level of medical decision making. When using total time on the date of the encounter for code selection, 30 minutes must be met or exceeded. | 79,779 79,721 | 0.0006 | 81,151 81,184 | 0.0003 |
| CPT99213 Office or other outpatient visit for the evaluation and management of an established patient, which requires a medically appropriate history and/or examination and low level of medical decision making. When using total time on the date of the encounter for code selection, 20 minutes must be met or exceeded. | 70,871 70,450 | 0.0043 | 72,336 71,986 | 0.0035 |
| CPT99285 Emergency department visit for the evaluation and management of a patient, which requires a medically appropriate history and/or examination and high level of medical decision making | 41,599 41,243 | 0.0043 | 42,536 42,254 | 0.0033 |
| CPT99284 Emergency department visit for the evaluation and management of a patient, which requires a medically appropriate history and/or examination and moderate level of medical decision making | 38,466 38,134 | 0.0041 | 39,620 39,344 | 0.0034 |
| CPT99283 Emergency department visit for the evaluation and management of a patient, which requires a medically appropriate history and/or examination and low level of medical decision making | 26,681 26,302 | 0.0055 | 27,426 27,184 | 0.0034 |
| CPT99223 Initial hospital inpatient or observation care, per day, for the evaluation and management of a patient, which requires a medically appropriate history and/or examination and high level of medical decision making. When using total time on the date of the encounter for code selection, 75 minutes must be met or exceeded. | 25,115 25,079 | 0.0005 | 25,923 25,813 | 0.0016 |
| CPT99222 Initial hospital inpatient or observation care, per day, for the evaluation and management of a patient, which requires a medically appropriate history and/or examination and moderate level of medical decision making. When using total time on the date of the encounter for code selection, 55 minutes must be met or exceeded. | 18,312 18,164 | 0.0025 | 19,040 18,798 | 0.004 |
| CPT99282 Emergency department visit for the evaluation and management of a patient, which requires a medically appropriate history and/or examination and straightforward medical decision making | 9,201 9,102 | 0.0023 | 9,700 9,568 | 0.003 |
| CPT92014 Ophthalmological services: medical examination and evaluation, with initiation or continuation of diagnostic and treatment program; comprehensive, established patient, 1 or more visits | 8,755 8,691 | 0.0015 | 9,102 9,049 | 0.0012 |
| CPT92004 Ophthalmological services: medical examination and evaluation with initiation of diagnostic and treatment program; comprehensive, new patient, 1 or more visits | 8,468 8,340 | 0.0031 | 8,900 8,887 | 0.0003 |
| CPT99221 Initial hospital inpatient or observation care, per day, for the evaluation and management of a patient, which requires a medically appropriate history and/or examination and straightforward or low level medical decision making. When using total time on the date of the encounter for code selection, 40 minutes must be met or exceeded. | 8,241 8,195 | 0.0011 | 8,549 8,490 | 0.0014 |
| CPT99281 Emergency department visit for the evaluation and management of a patient that may not require the presence of a physician or other qualified health care professional | 2,694 2,696 | < 0.0001 | 2,847 2,826 | 0.0009 |

sFigure 1. nAMD Diagnosis Kaplan-Meier curve
The image below was generated by the TriNetX Software, and is unable to be modified. The exact number at risk at each time was not provided by the software and rough estimates were not calculated for the curves displayed here.

nAMD = neovascular age-related macular degeneration
Purple = Glucagon-Like Peptide-1 Receptor Agonists
Teal = Sodium-Glucose Cotransporter-2 inhibitors


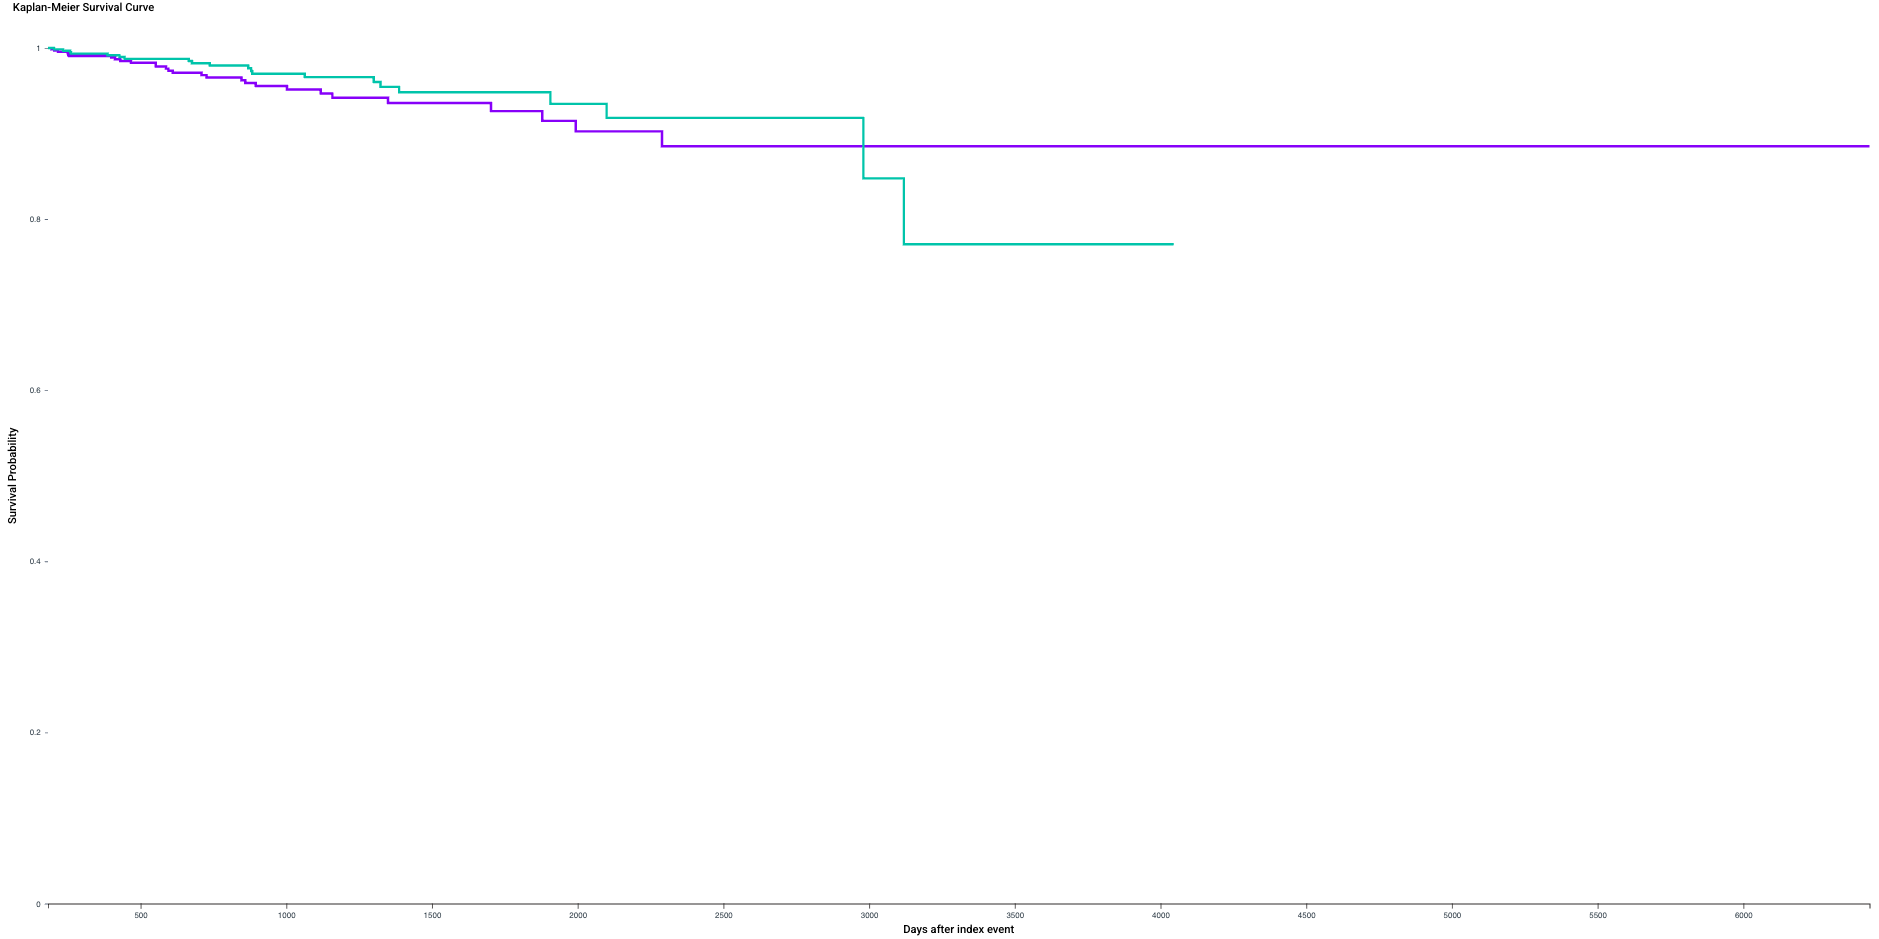


sFigure 2. nAMD Procedure Kaplan-Meier curve
The image below was generated by the TriNetX Software, and is unable to be modified. The exact number at risk at each time was not provided by the software and rough estimates were not calculated for the curves displayed here.

nAMD = neovascular age-related macular degeneration
Purple = Glucagon-Like Peptide-1 Receptor Agonists
Teal = Sodium-Glucose Cotransporter-2 inhibitors


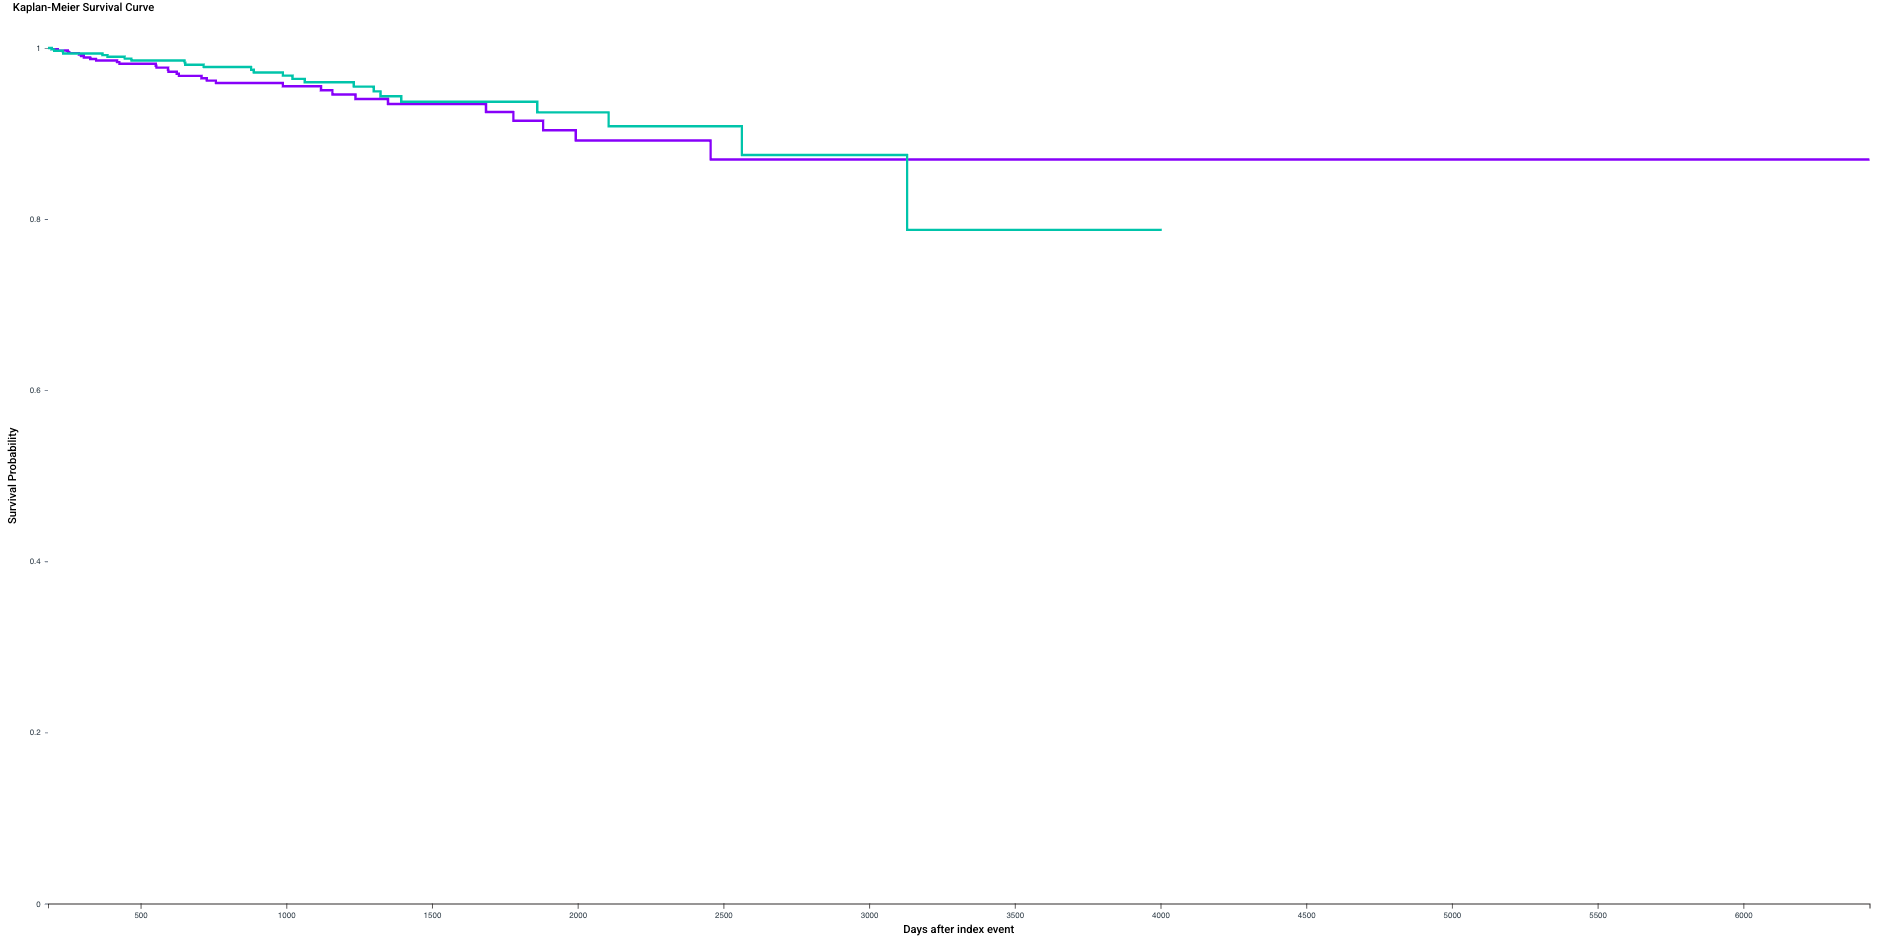


sFigure 3. GlaucomaDiagnosis Kaplan-Meier curve (Primary Analysis)
The image below was generated by the TriNetX Software, and is unable to be modified. The exact number at risk at each time was not provided by the software and rough estimates were not calculated for the curves displayed here.

Purple = Glucagon-Like Peptide-1 Receptor Agonists
Teal = Dipeptidyl Peptidase-4 inhibitors


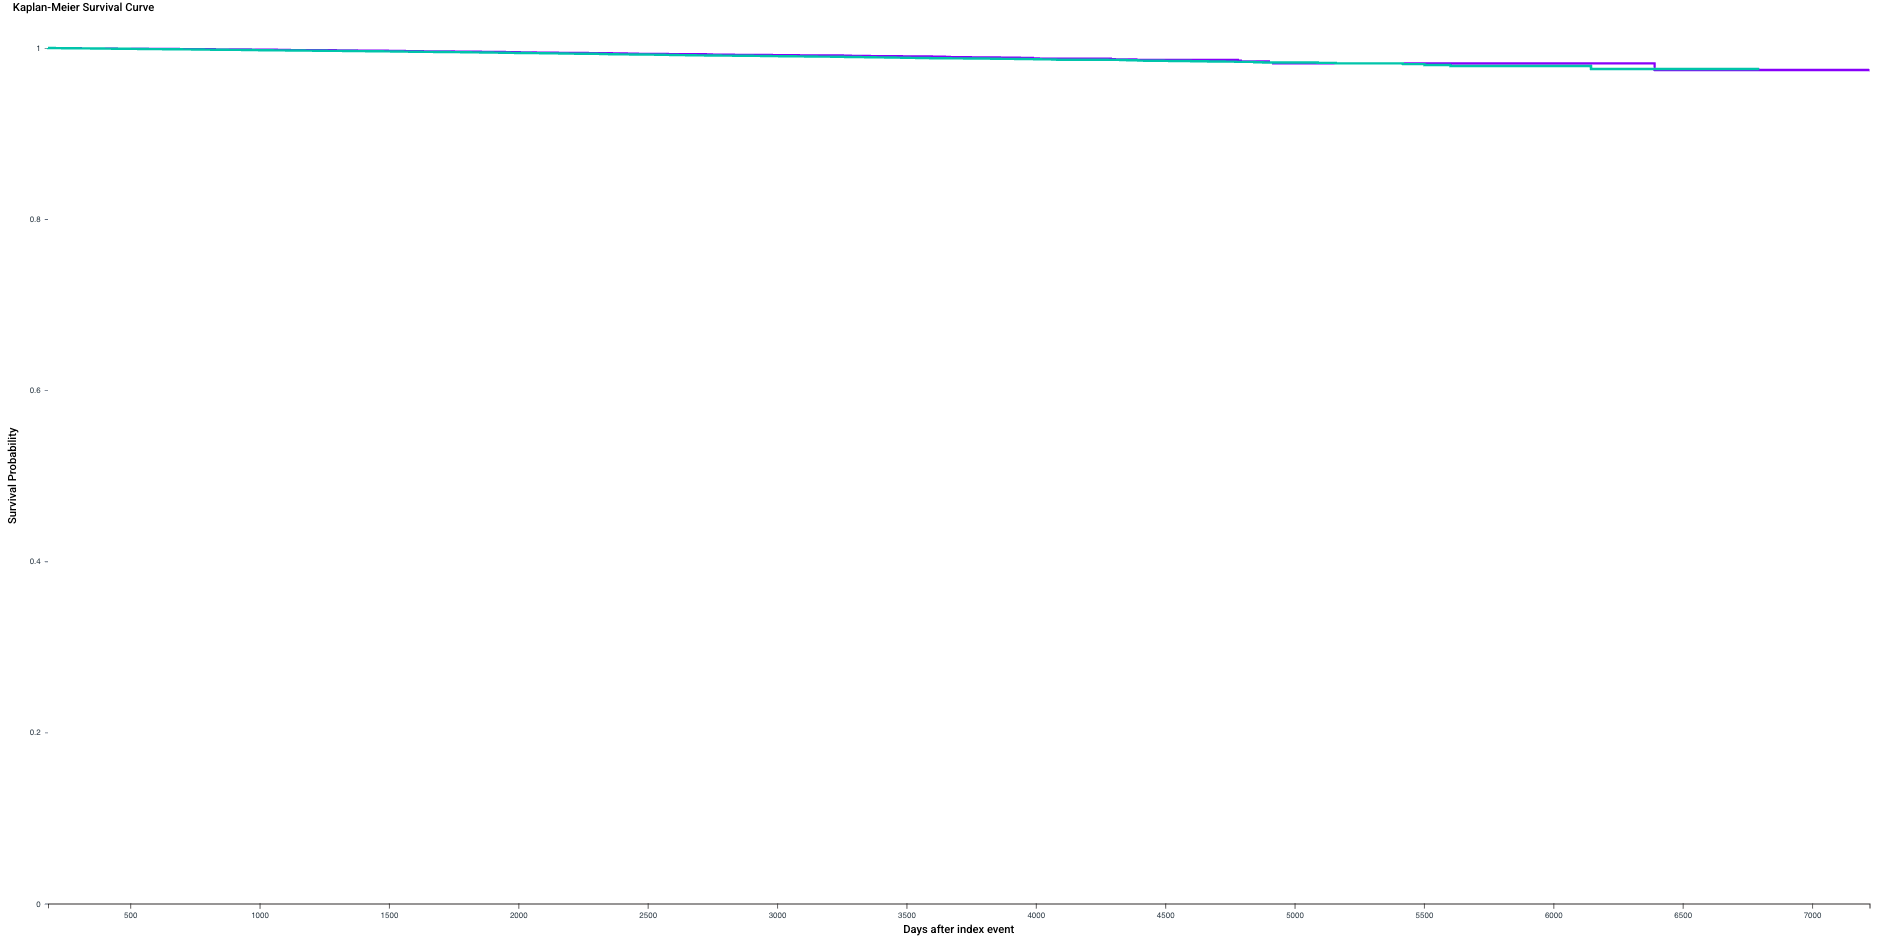


sFigure 4. Glaucoma Procedure Kaplan-Meier curve (Primary Analysis)

The image below was generated by the TriNetX Software, and is unable to be modified. The exact number at risk at each time was not provided by the software and rough estimates were not calculated for the curves displayed here.

Purple = Glucagon-Like Peptide-1 Receptor Agonists

Teal = Dipeptidyl Peptidase-4 inhibitors


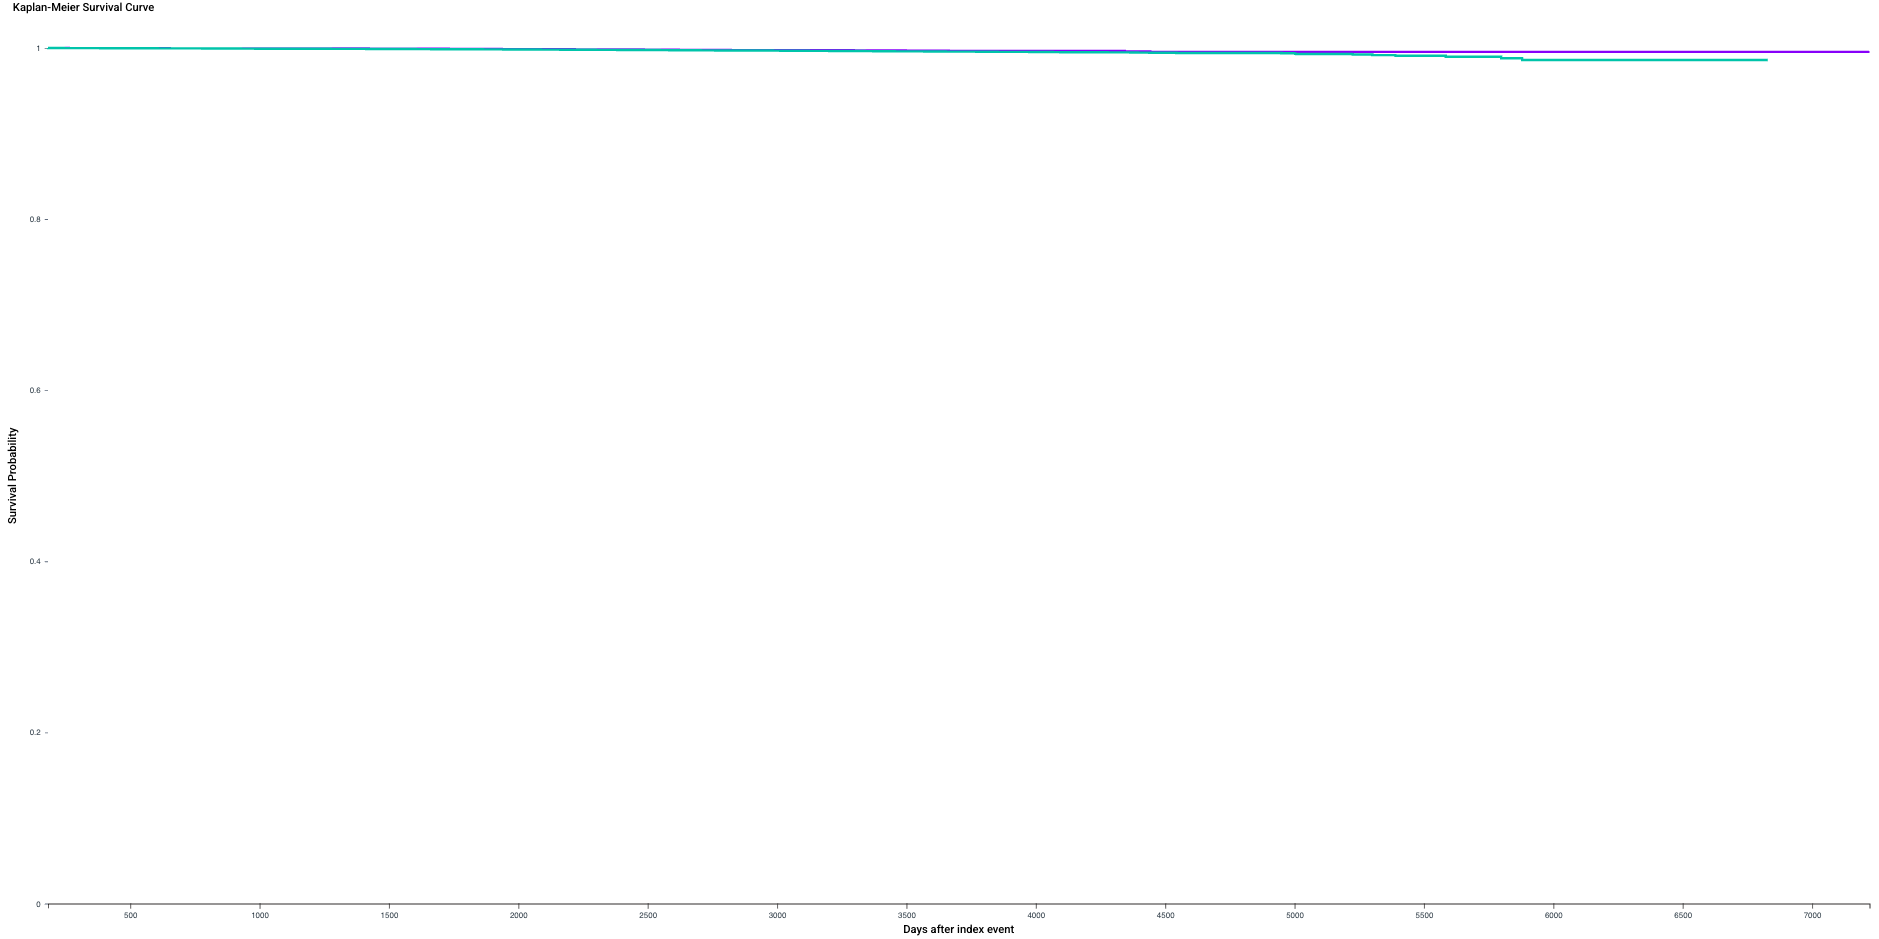


sFigure 5. DR Diagnosis Kaplan-Meier curve
The image below was generated by the TriNetX Software, and is unable to be modified. The exact number at risk at each time was not provided by the software and rough estimates were not calculated for the curves displayed here.

DR = Diabetic Retinopathy
Purple = Glucagon-Like Peptide-1 Receptor Agonists
Teal = Sodium-Glucose Cotransporter-2 inhibitors


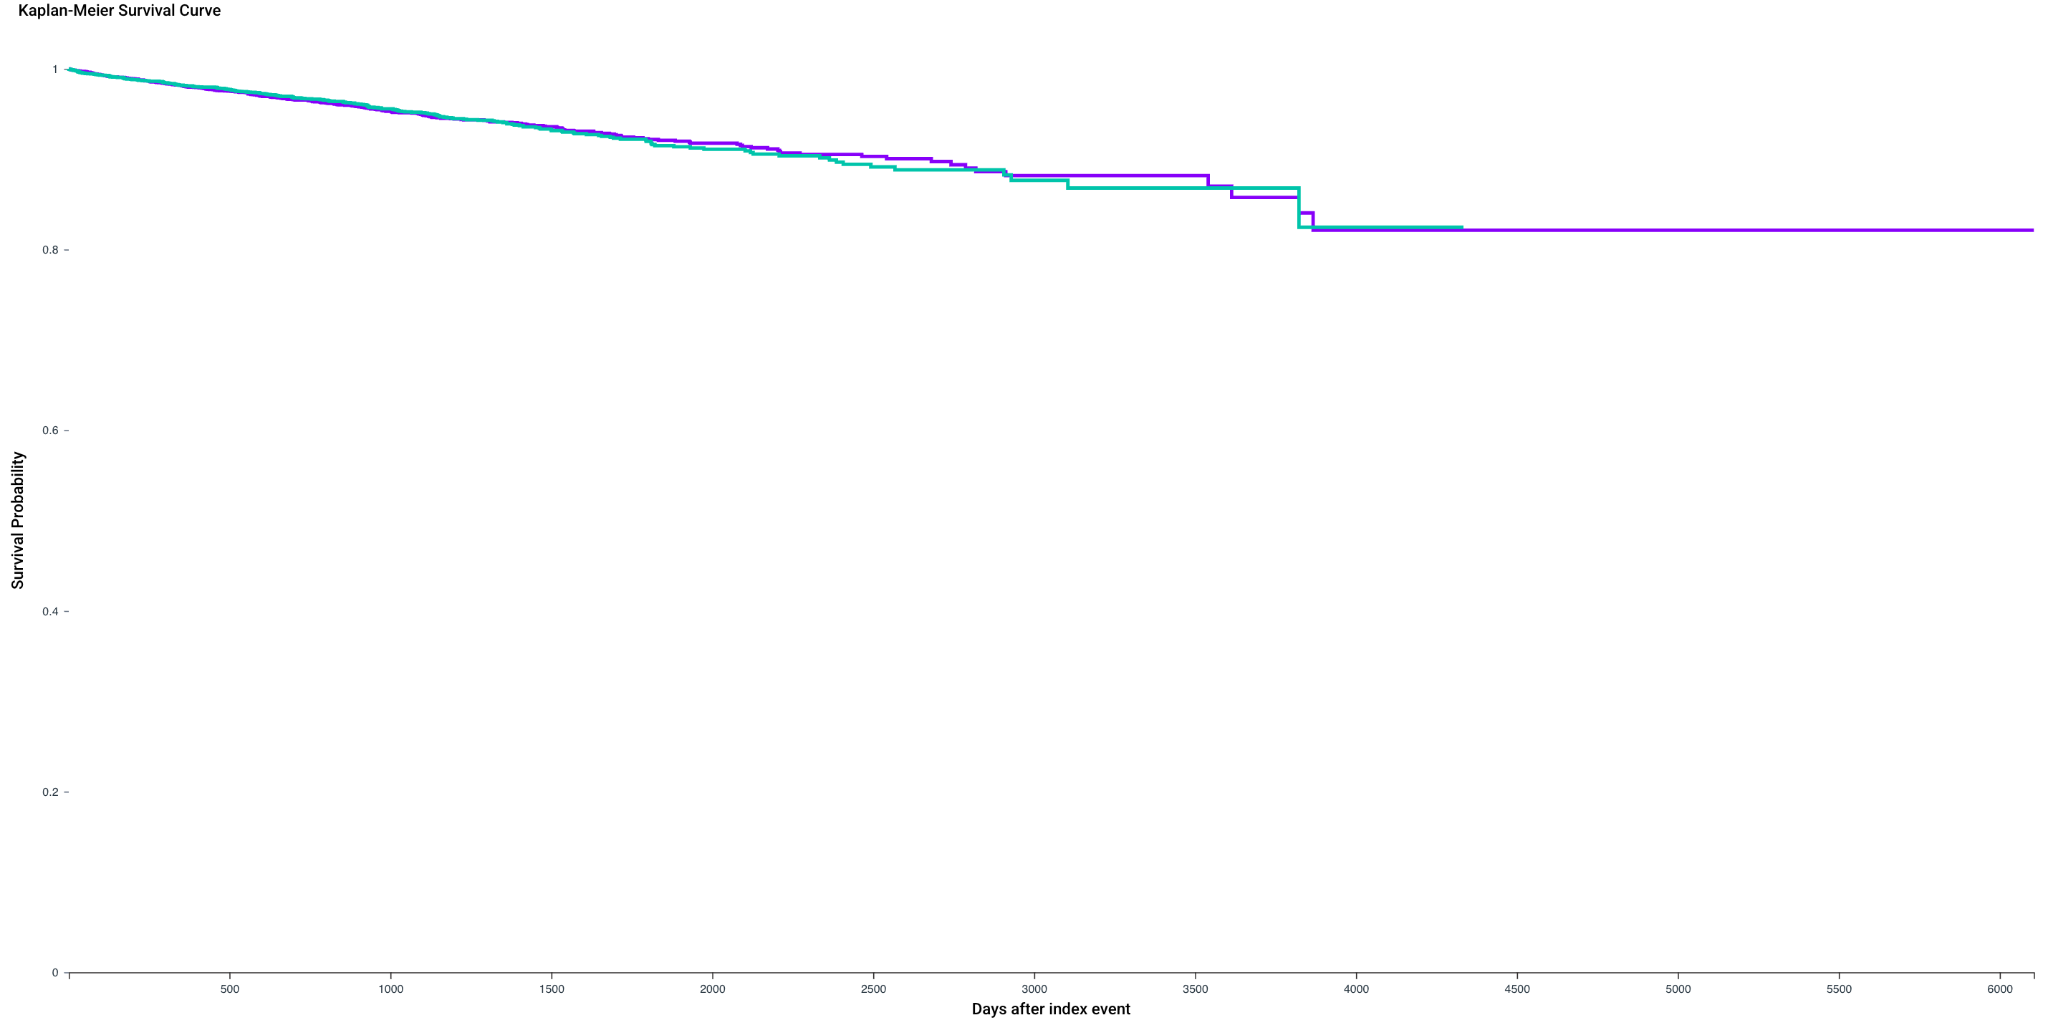


sFigure 6. DR Procedure Kaplan-Meier curves
The image below was generated by the TriNetX Software, and is unable to be modified. The exact number at risk at each time was not provided by the software and rough estimates were not calculated for the curves displayed here.

DR = Diabetic Retinopathy
Purple = Glucagon-Like Peptide-1 Receptor Agonists
Teal = Sodium-Glucose Cotransporter-2 inhibitors


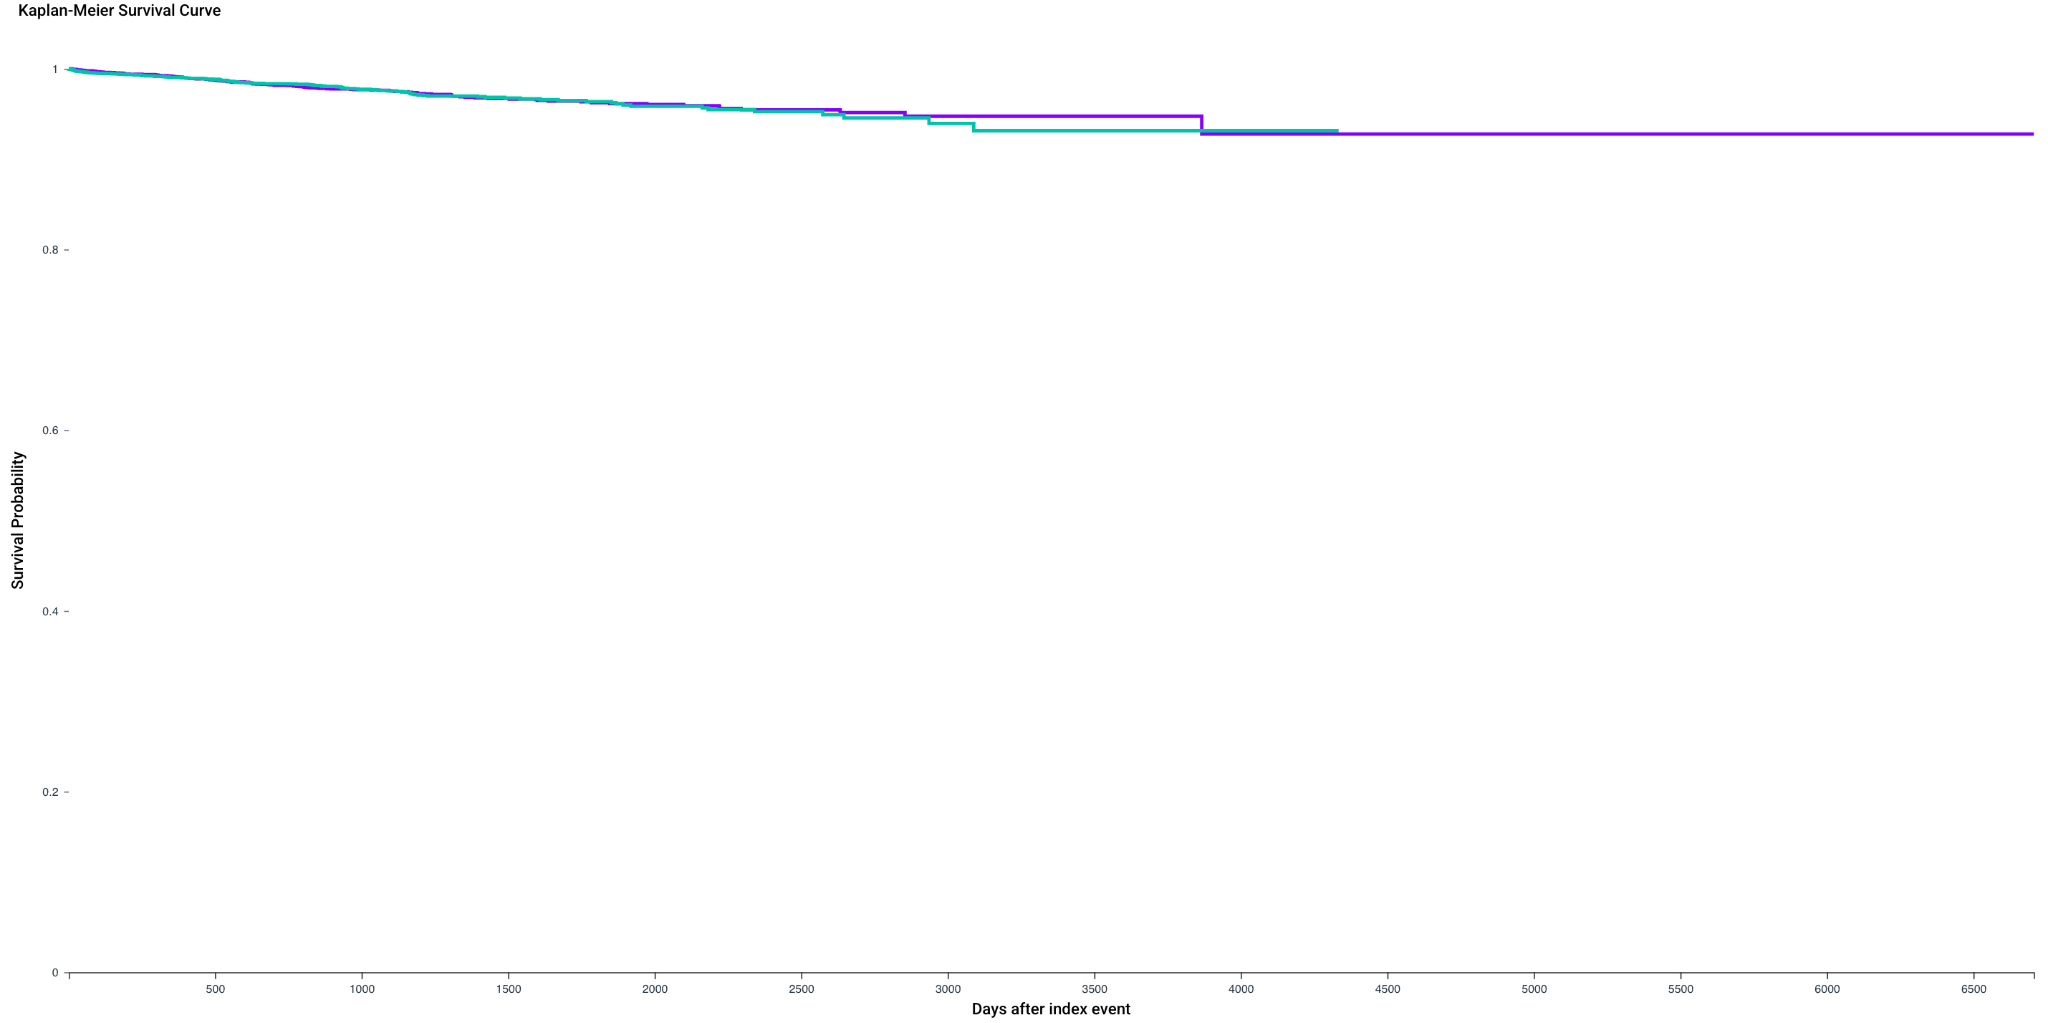


sFigure 7. Glaucoma(1-Year) Diagnosis Kaplan-Meier curve
(Secondary Analysis)
The image below was generated by the TriNetX Software, and is unable to be modified. The exact number at risk at each time was not provided by the software and rough estimates were not calculated for the curves displayed here.

Purple = Glucagon-Like Peptide-1 Receptor Agonists
Teal = Dipeptidyl Peptidase-4 inhibitors


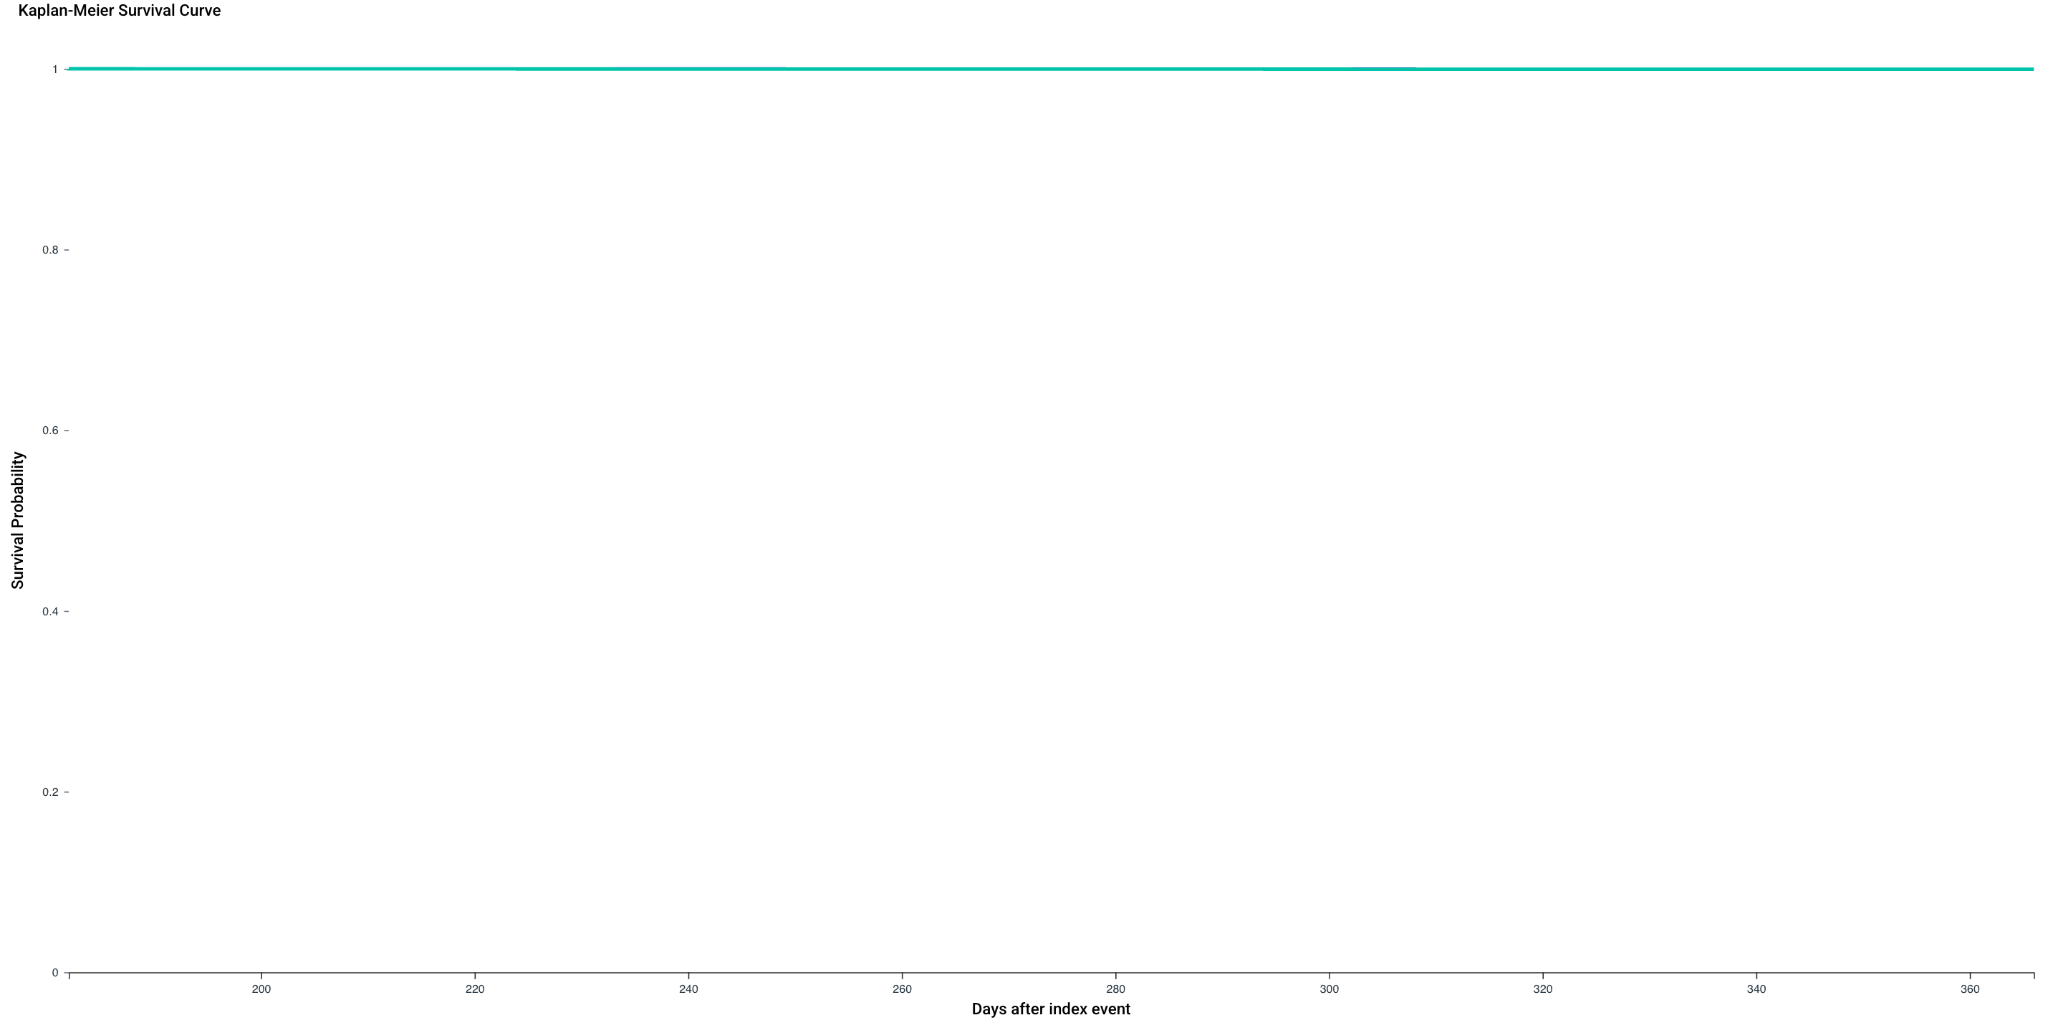


sFigure 8. Glaucoma(1-Year) Procedure Kaplan-Meier curve
(Secondary Analysis)
The image below was generated by the TriNetX Software, and is unable to be modified. The exact number at risk at each time was not provided by the software and rough estimates were not calculated for the curves displayed here.

Purple = Glucagon-Like Peptide-1 Receptor Agonists
Teal = Dipeptidyl Peptidase-4 inhibitors


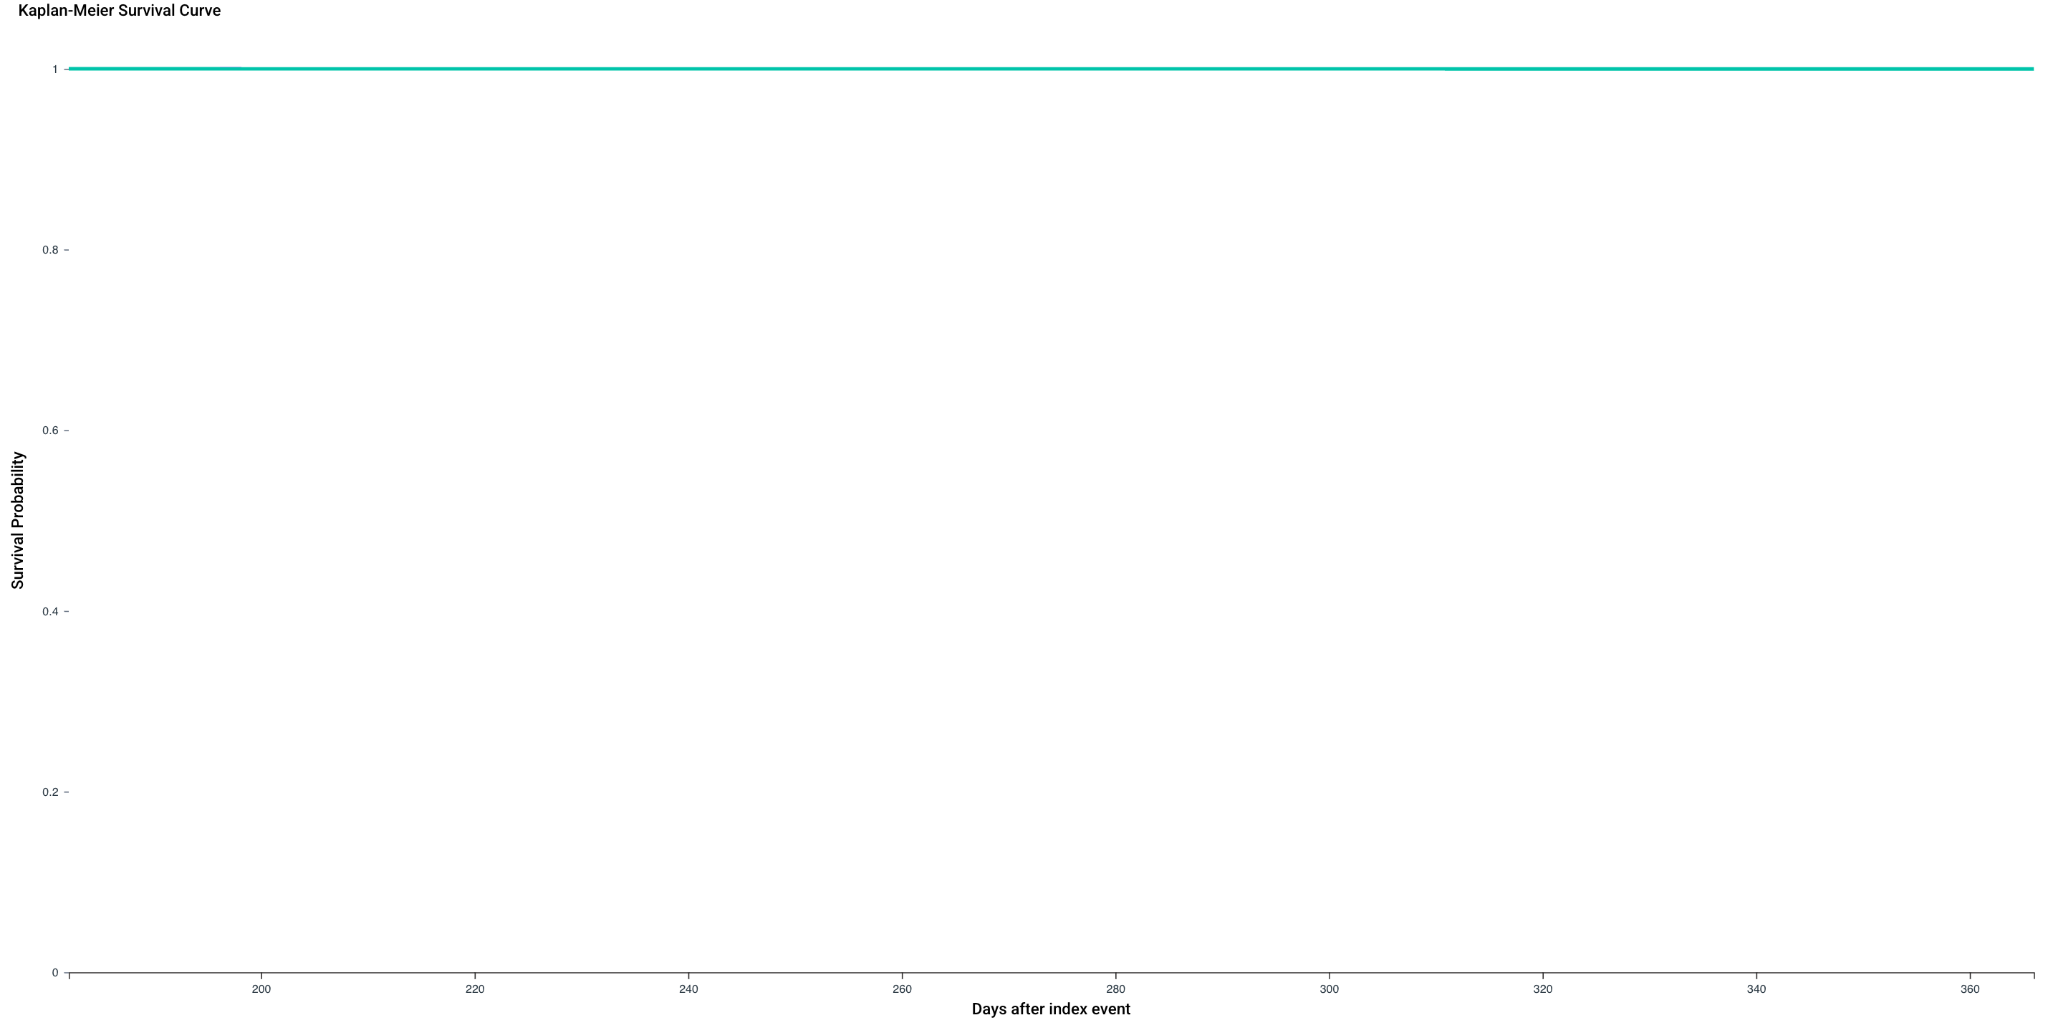


sFigure 9. Glaucoma(2-Year) Procedure Kaplan-Meier curve
(Secondary Analysis)
The image below was generated by the TriNetX Software, and is unable to be modified. The exact number at risk at each time was not provided by the software and rough estimates were not calculated for the curves displayed here.

Please note the Glaucoma (2-Year) Diagnosis Kaplan-Meier curve is represented in the main manuscript.

Purple = Glucagon-Like Peptide-1 Receptor Agonists
Teal = Dipeptidyl Peptidase-4 inhibitors


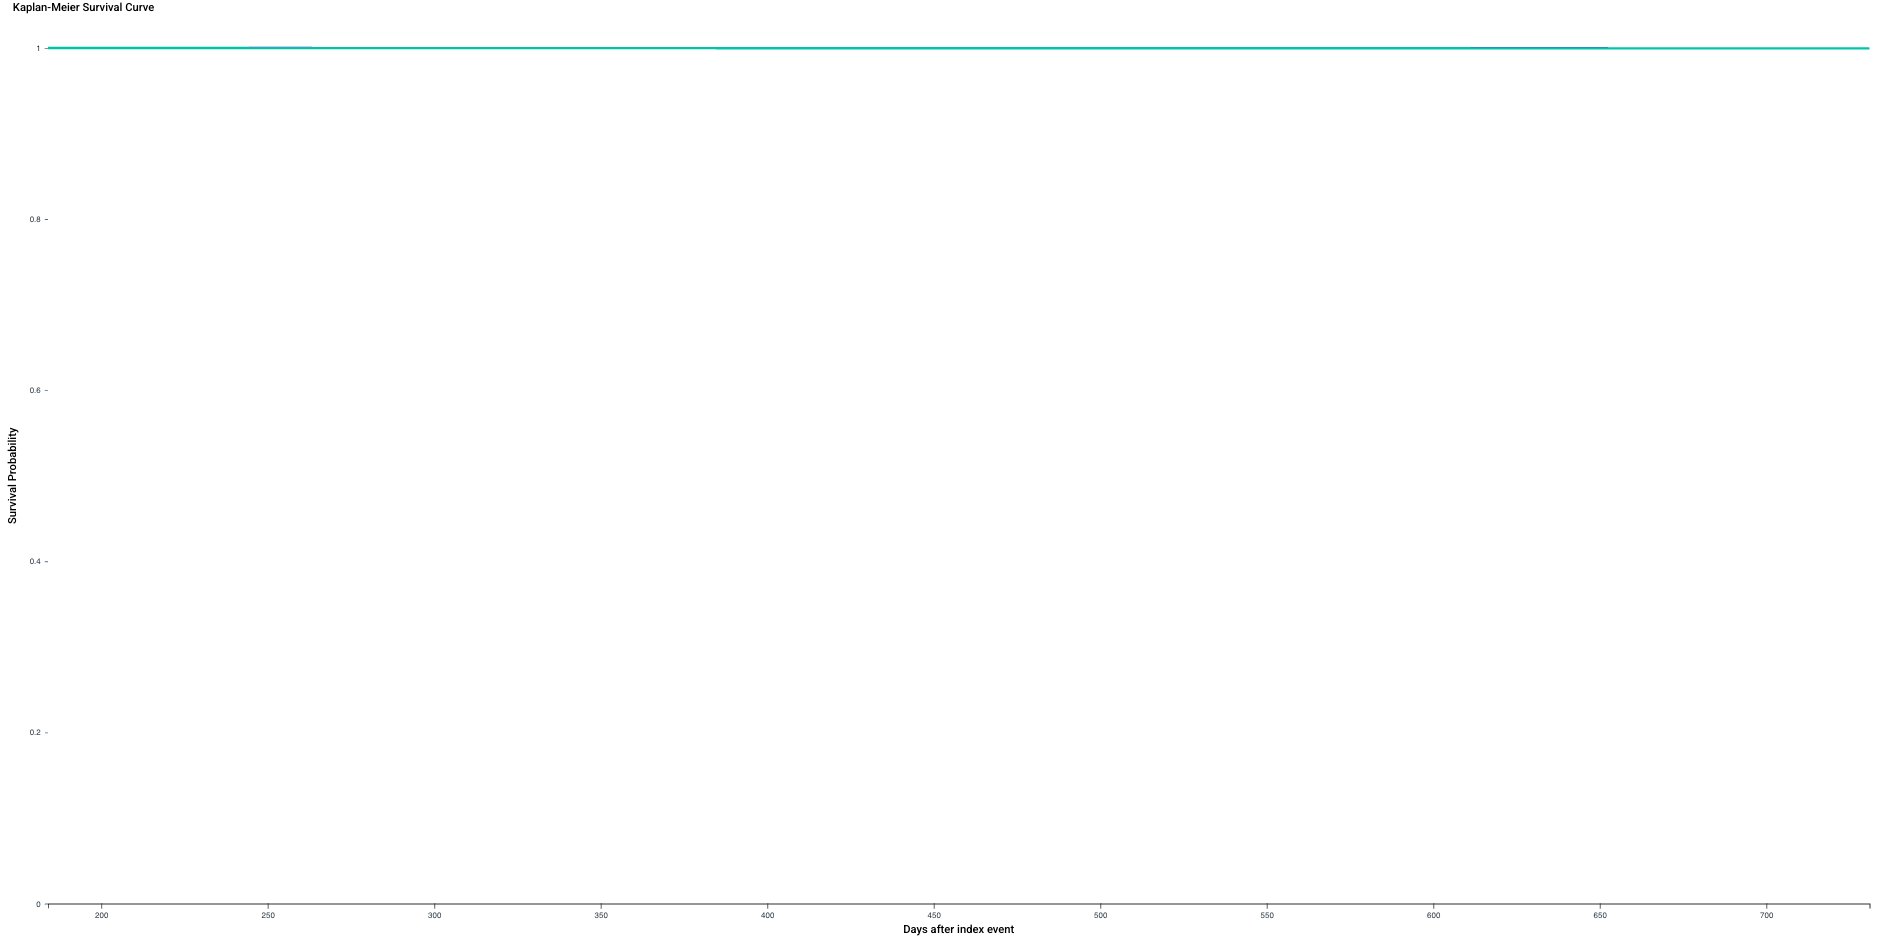


sFigure 10. nAMD Kernel-density plots

Propensity-score overlap before and after matching. Kernel-density estimates of propensity-score distributions by treatment group before matching (left) and after matching (right), demonstrating broad common support and near-coinciding post-match densities.

Purple = Glucagon-Like Peptide-1 Receptor Agonists
Teal = Sodium-Glucose Cotransporter-2 inhibitors


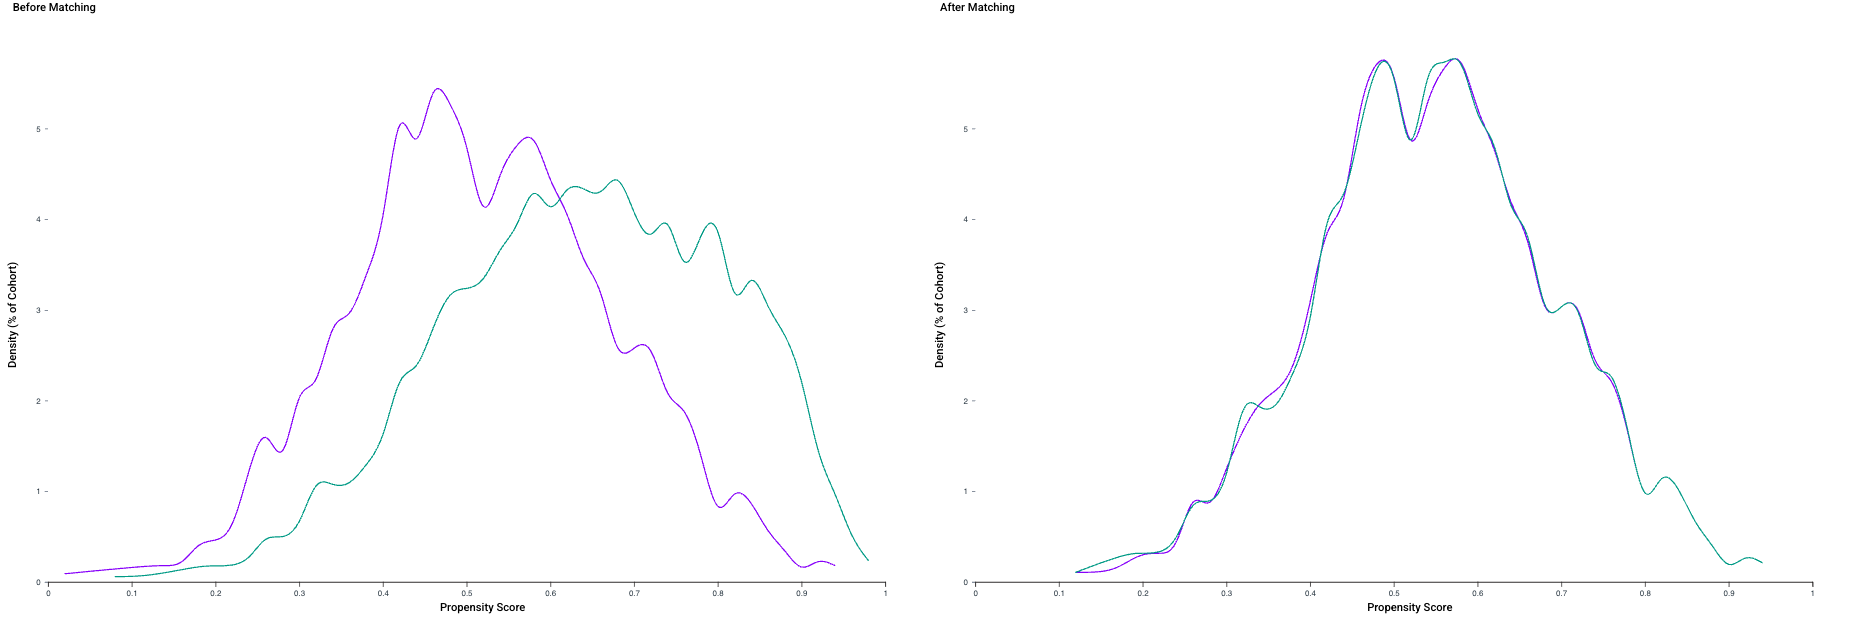

Supplement: Supplementary file 1 [file 32296d6885968d24e98af64b.docx]
